# Supplementary material
Source: Research Square preprint supplement (doi:10.21203/rs.3.rs-9252188/v1)
Supplement: Supplementary file 1 [file f79beac25b6903472bdd6bd2.docx]

**
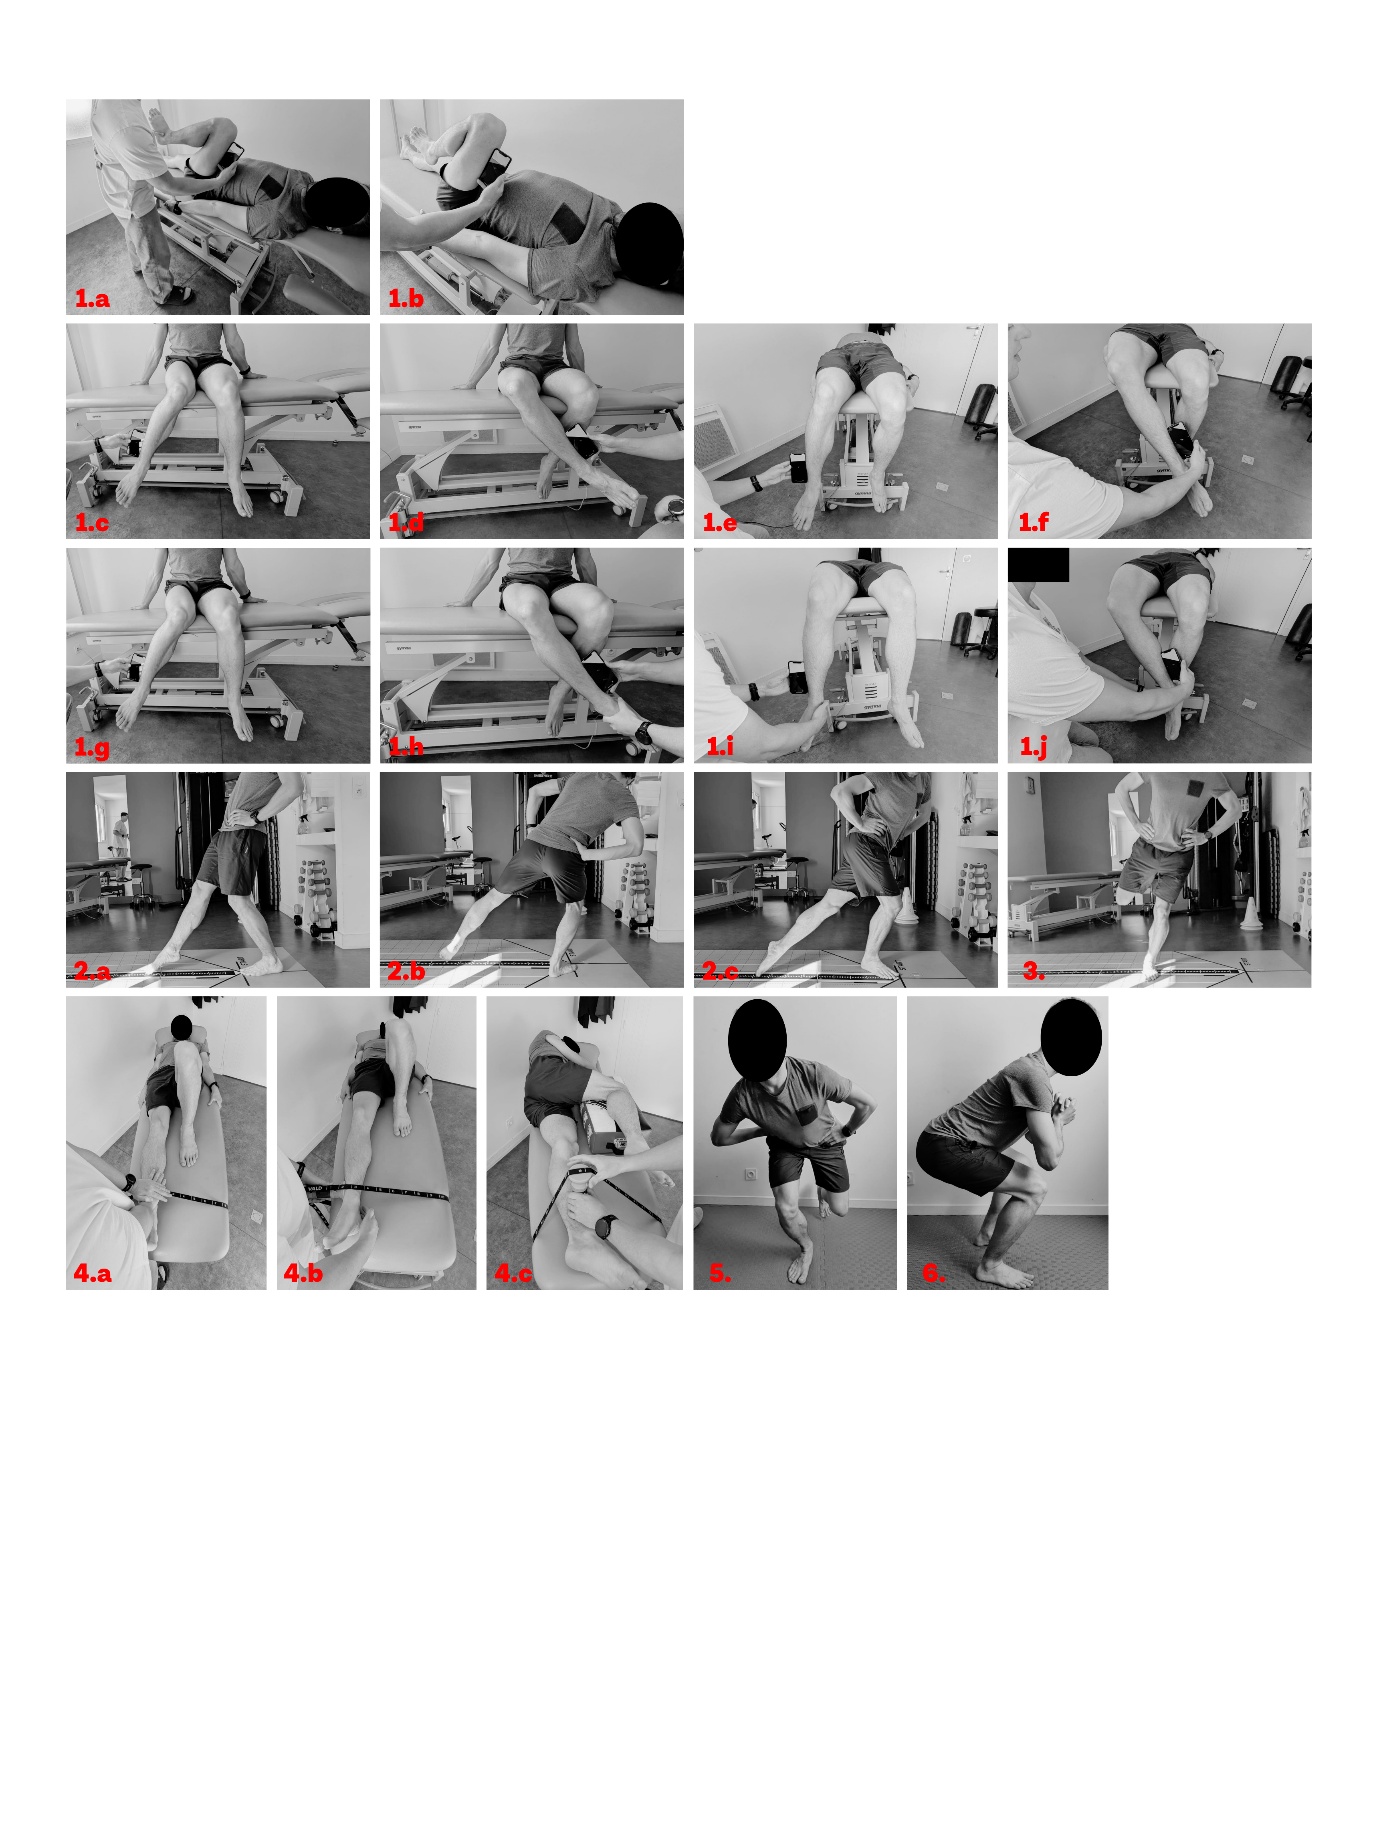
Appendix A**. Standardized test positions included in the hip assessment battery.

Panels **1a and 1b** illustrate passive and active hip flexion, respectively, measured using an inclinometer aligned with the longitudinal axis of the femur. Passive internal and external hip rotation are presented in a seated position at 90° of hip flexion (**1c–1d**) and in a neutral position (0° flexion) (**1i–1j**), while active internal and external rotation in neutral position are shown in **1e–1f.** Additional passive rotational assessments at 90° of hip flexion are depicted in **1g–1h.** Panels **2a–2c** correspond to the modified Star Excursion Balance Test performed in the anterior, posterolateral, and posteromedial directions. Panel 3 illustrates the medial hop test. Maximal isometric strength assessments are shown in panels **4a–4c** for the hip flexors (with hip and knee at 0°), abductors, and adductors, respectively. Dynamic performance is assessed using a single-leg squat (**panel 5**), while muscular endurance is evaluated with a squat held at approximately 100° of knee flexion (**panel 6**).
